# Supplementary material for: Prevalence and characterisation of carbapenemase encoding genes in multidrug-resistant Gram-negative bacilli
Source: PubMed Central journal article supplement (PMC8559951; doi:10.1371/journal.pone.0259005), 2021-11-01
Supplement: pone.0259005.s001.pdf [file pone.0259005.s001.pdf]

1

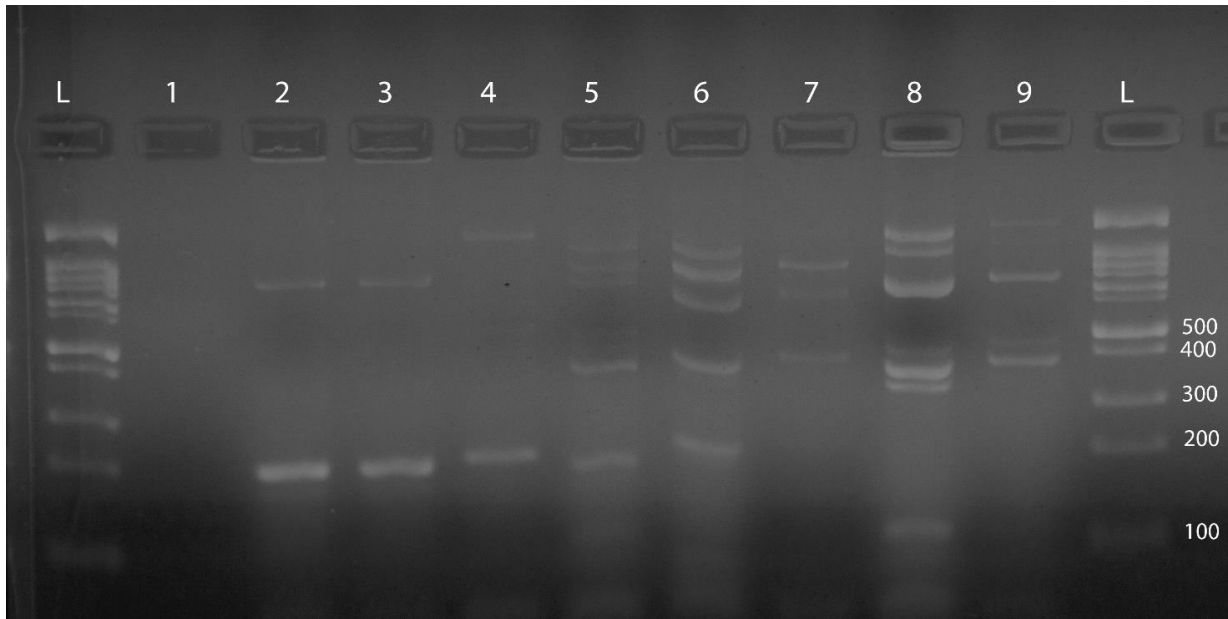

2

3 Detection of carbapenemase genes IMP, and VIM in carbapenemase-producing Gram-negative bacilli isolates,  
4 using multiplex PCR (**Original image**)

5

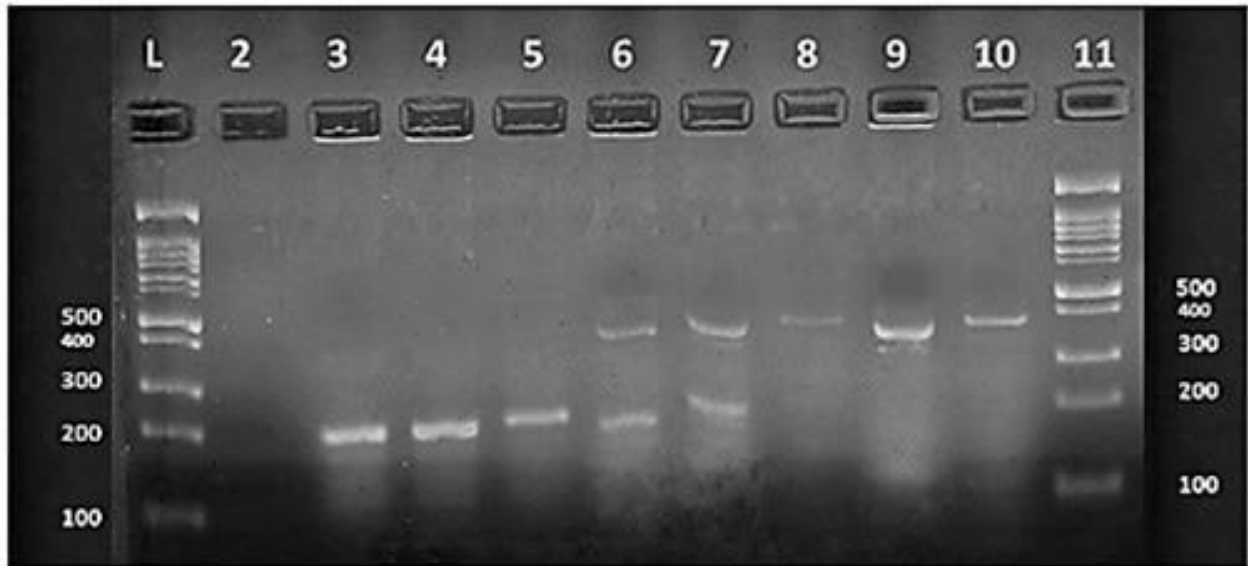

6

7

8 **Fig 2.1.** Detection of carbapenemase genes IMP, and VIM in carbapenemase-producing Gram-negative  
9 bacilli isolates, using multiplex PCR. Lanes 3–5 represent the positive IMP carbapenemase gene, Lanes  
10 8–10 represent the positive VIM carbapenemase gene, Lanes 6 and 7 represent co-expression of IMP  
11 and VIM genes. The molecular size of the IMP and VIM genes are 232 and 390 bp respectively. Lane 1  
12 and 11 are a 1-kb DNA ladder. Lane 2 corresponds to the negative control.

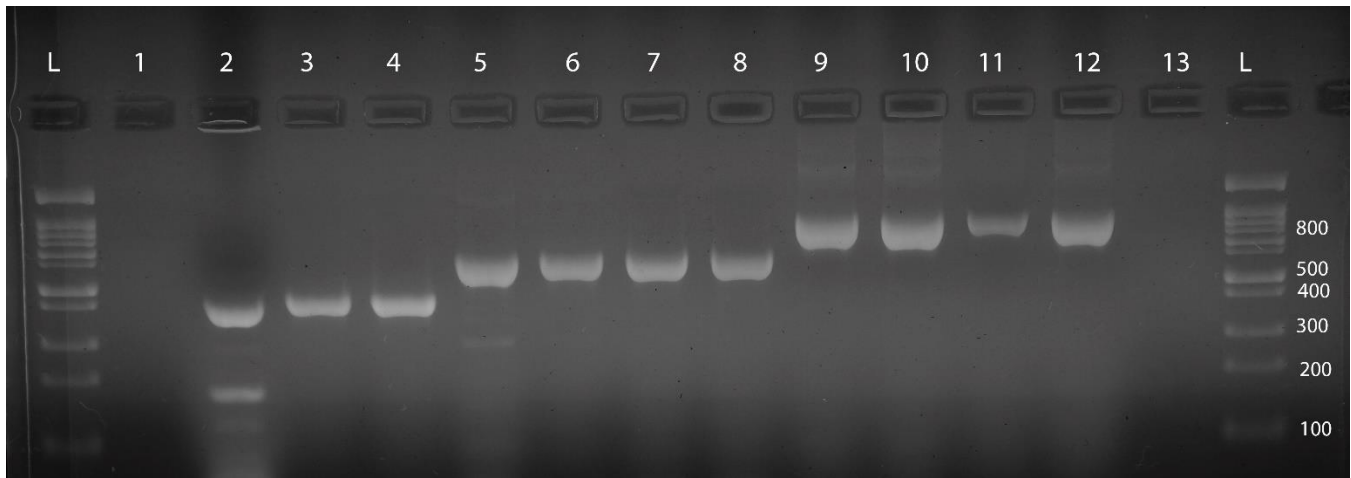

13

14 Detection of the carbapenemase genes OXA, NDM, and KPC in carbapenemase-producing Gram-negative bacilli  
 15 isolates, using singleplex PCR (Original image)

16

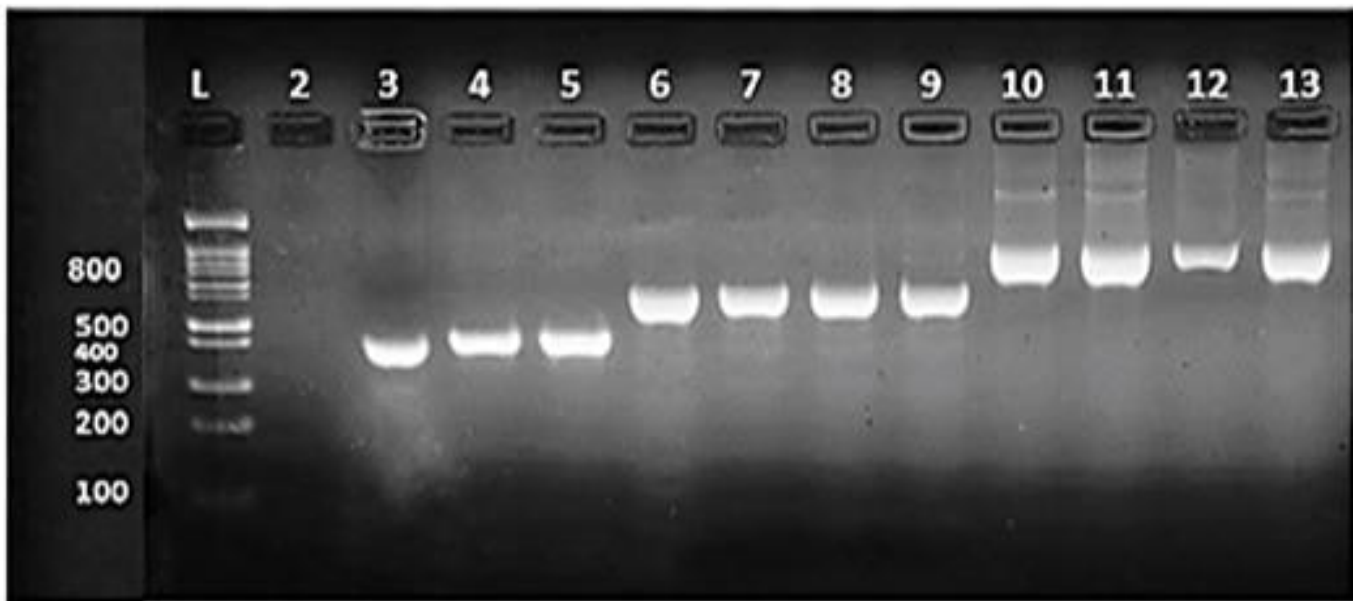

17

18 **Fig 2.2.** Detection of the carbapenemase genes OXA, NDM, and KPC in carbapenemase-producing Gram-  
 19 negative bacilli isolates, using singleplex PCR. Lanes 3–5 represent the positive OXA-48 gene, Lanes 6–9  
 20 represent the positive NDM gene, and Lanes 10–13 represent the positive KPC gene. Lane 1 is a 1-kb DNA ladder.  
 21 Lane 2 corresponds to the negative control. The molecular size of the tested *bla*<sub>OXA-48</sub>, *bla*<sub>NDM</sub>, and *bla*<sub>KPC</sub>  
 22 carbapenemase genes are 438, 621 and 798 bp respectively.
